# Supplementary material
Source: PubMed Central journal article supplement (PMC6021558)
Supplement: NIHMS929035-supplement-1.pdf [file NIHMS929035-supplement-1.pdf]

## Supplemental Items

### Supplemental Information Inventory:

1. **Figure S1. High-level study metrics. Related to Figure 1.**
2. **Figure S2. Discriminant transcript and metabolomic pathways between IR and IS. Related to Figure 2.**
3. **Figure S3. Changes in plasma in response to weight gain and loss. Related to Figure 3.**
4. **Figure S4. Patterns observed in response to weight gain and loss. Related to Figure 4.**
5. **Figure S5. Analysis of personal and other sources of omic variation. Related to Figure 6.**
6. **Figure S6. Distribution of plasma metabolite concentrations across the dataset following normalization. Related to Figures 2, 3 and 4.**
7. **Table S1. An overview of clinical parameters measured in the study. Related to Figure 1.**
8. **Table S2. Significant differences in transcripts, proteins, metabolites, microbes, clinical assays and pathways between IR and IS individuals. Related to Figure 2. See separate Excel table.**
9. **Table S3. Significant differences in transcripts, proteins, metabolites, metabolites and clinical assays across the weight gain/loss perturbation. Related to Figures 3, 4 and 5.**
10. **Table S4. Validation of metabolomic changes in a validation cohort. Related to Figure 3.**
11. **Table S5. Read depth and mapping fraction for RNA-seq data. Related to Figures 2, 3, 4 and 6.**
12. **Table S6. Read and assembly stats for microbiome samples. Related to Figures 2, 3, 4, 5 and 6.**

A.

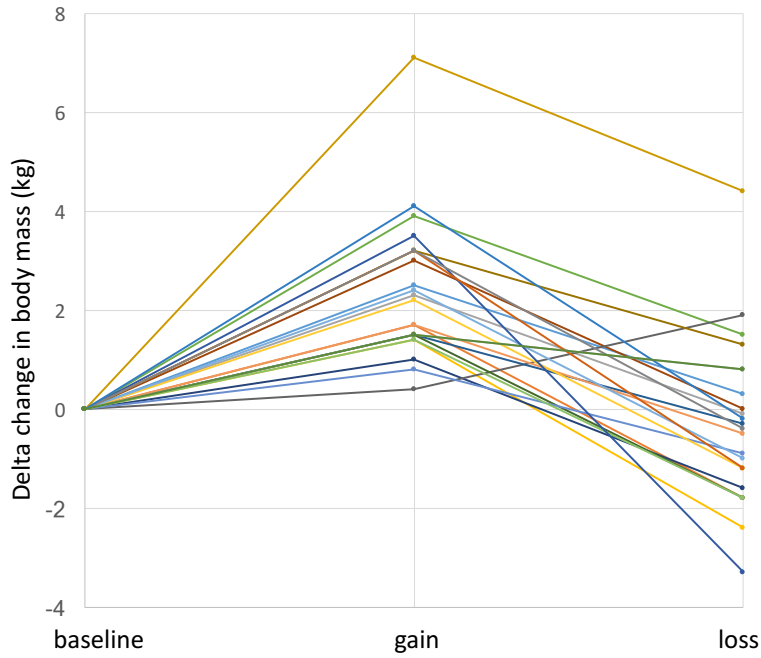

B.

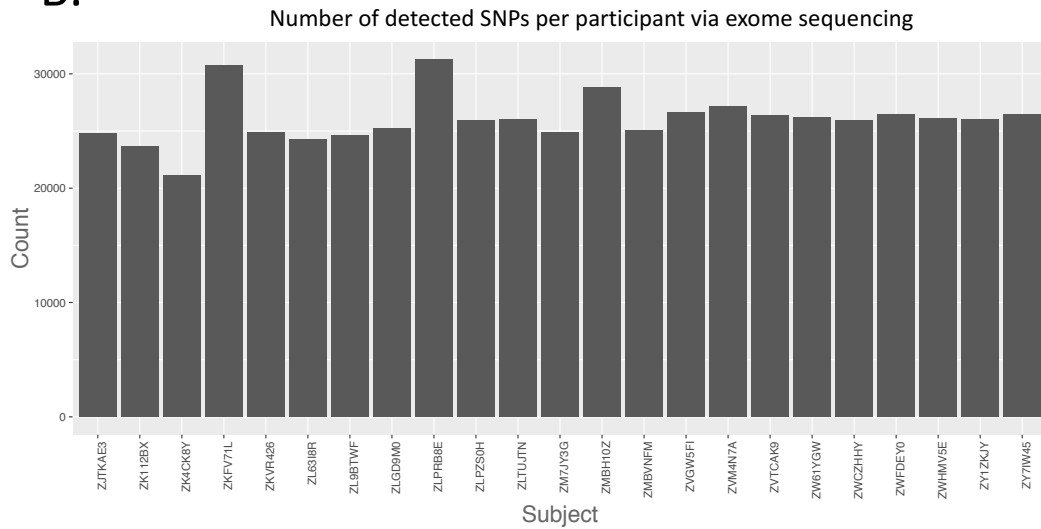

**Figure S1. High-level study metrics. Related to Figure 1.** A) Change in body mass from baseline. Participant body mass was assessed immediately prior to blood sampling at the indicated timepoints (T1, T2, T3). All participants completed an overnight fast prior to measurement. B) Distribution of SNVs across the cohort. The number of single nucleotide variant (SNV) calls is plotted for each study participant.

A.

| Pathway                                | Database | adjusted p-value |
|----------------------------------------|----------|------------------|
| muscle contraction                     | GO       | 3.3E-06          |
| circulatory system development         | GO       | 5.5E-06          |
| extracellular matrix organization      | GO       | 1.3E-04          |
| response to oxygen-containing compound | GO       | 1.5E-03          |
| leukocyte migration                    | GO       | 1.5E-03          |
| neutrophil migration                   | GO       | 2.5E-03          |
| inflammatory response                  | GO       | 6.5E-03          |
| collagen catabolic process             | GO       | 6.8E-03          |
| response to bacterium                  | GO       | 1.5E-02          |
| lipid localization                     | GO       | 4.7E-02          |
| Protein digestion and absorption       | KEGG     | 4.5E-04          |
| Focal adhesion                         | KEGG     | 9.6E-04          |
| ECM-receptor interaction               | KEGG     | 6.7E-04          |
| Amoebiasis                             | KEGG     | 4.9E-03          |
| Malaria                                | KEGG     | 5.9E-03          |

B.

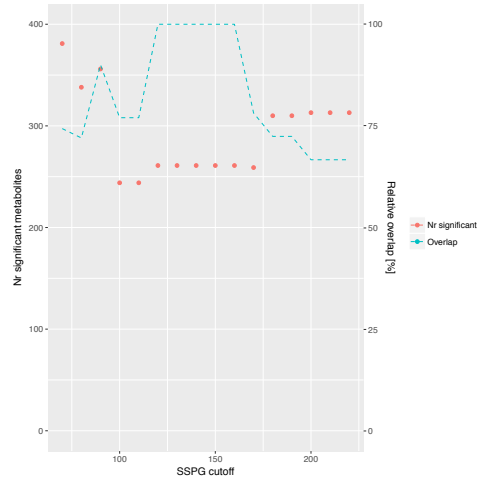

C.

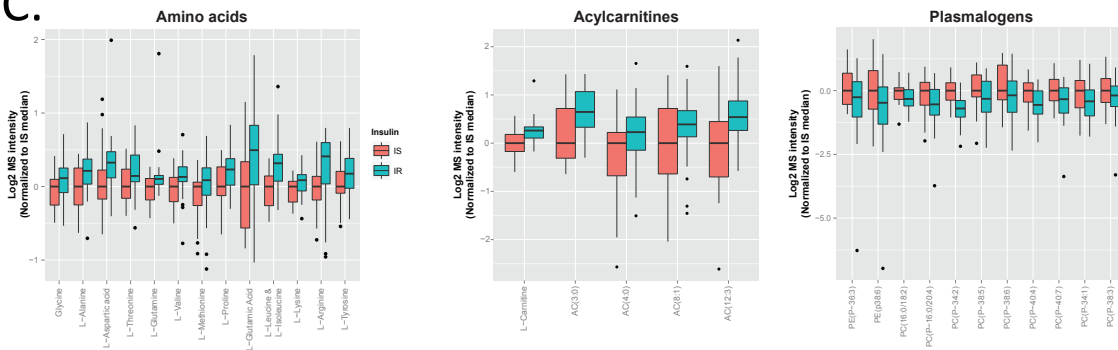

D.

| Model         | Precision | Recall | F1-score |
|---------------|-----------|--------|----------|
| Random forest | 88%       | 92%    | 88%      |
| AdaBoost      | 78%       | 78%    | 78%      |

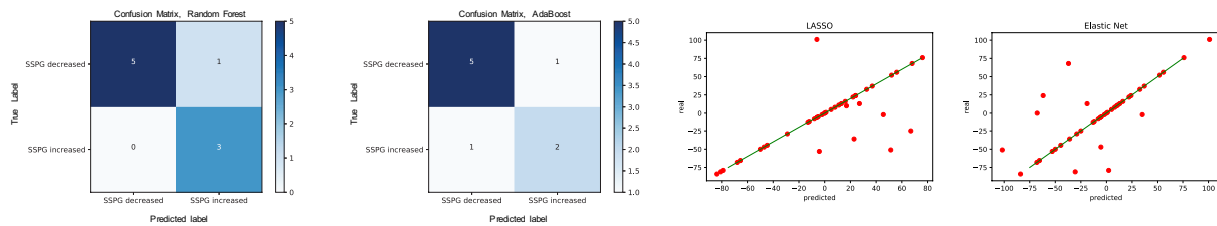

**Figure S2. Discriminant transcript and metabolomic pathways between IR and IS. Related to Figure 2.** A) Key pathways that are discriminant between IR and IS transcriptomes at baseline. Gene expression differences at a FDR < 0.2 significance cutoff were used as input into the DAVID pathway analysis suite, and pathways from either KEGG or Gene Ontology biological process categories were assessed. As multiple redundant pathways were identified as significant, key unique pathways are highlighted here (see Table S2 for the full list). B) Changes in the number of significant metabolites using different SSPG cutoffs for defining IR and IS. C) Significant metabolites between IR and IS for three different families of biomolecules: amino acids, acylcarnitines and plasmalogens. Intensities are plotted after normalization to IS. D) Top panel: performance measures of Random Forest and AdaBoost models in terms of Precision, Recall and F1 Score. Bottom left: Confusion matrices for 8 held-out samples

for Random Forest and AdaBoost. Bottom right:  $\Delta_{SSPG}$  computation at time ( $t^n$ ) using regression: Predicted vs. real delta SSPG values using LASSO and Elastic Net regression.

A.

Pathway enrichment

| Pathway                                     | Database | FDR   |
|---------------------------------------------|----------|-------|
| Glycerophospholipid metabolism              | HMDB     | 0.013 |
| Arginine and proline metabolism             | HMDB     | 0.016 |
| Alanine, aspartate and glutamate metabolism | HMDB     | 0.025 |

B.

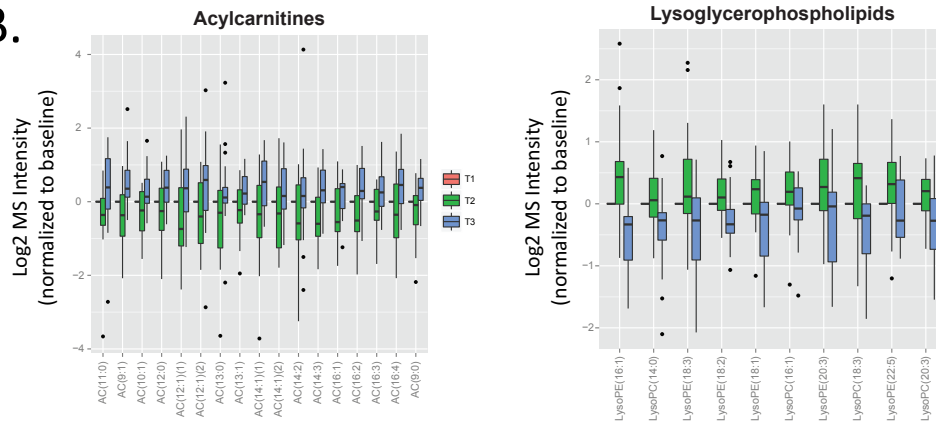

C.

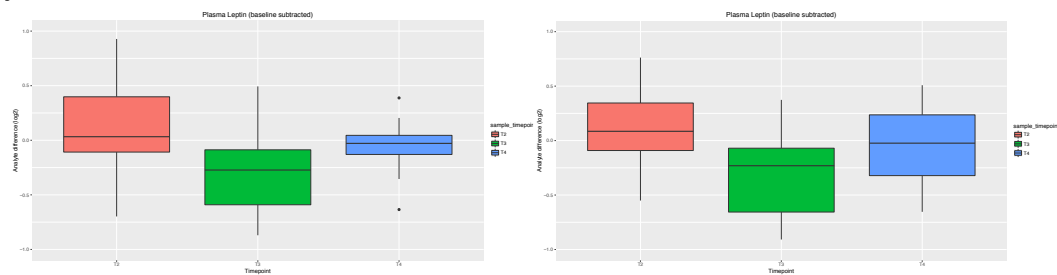

**Figure S3. Changes in plasma in response to weight gain and loss. Related to Figure 3.** A) Metabolites associated with changes in Body Mass Index (BMI). Pathway analysis using HMDB pathways is performed for metabolites associated with BMI. Top pathways along with the associated corrected p-values are shown. B) Differences in individual metabolites at peak weight and after weight loss for individual metabolites comprising top pathways. Intensities are plotted after normalization to baseline. C) Plasma leptin levels across the weight gain and loss perturbations. Plasma leptin was measured by two separate immunoassay methods (Olink Proseik and Luminex). Intensities were normalized to baseline values for each participant, and boxplots for log<sub>2</sub> intensities at peak weight, weight loss and followup timepoints are shown for both measurement methods.

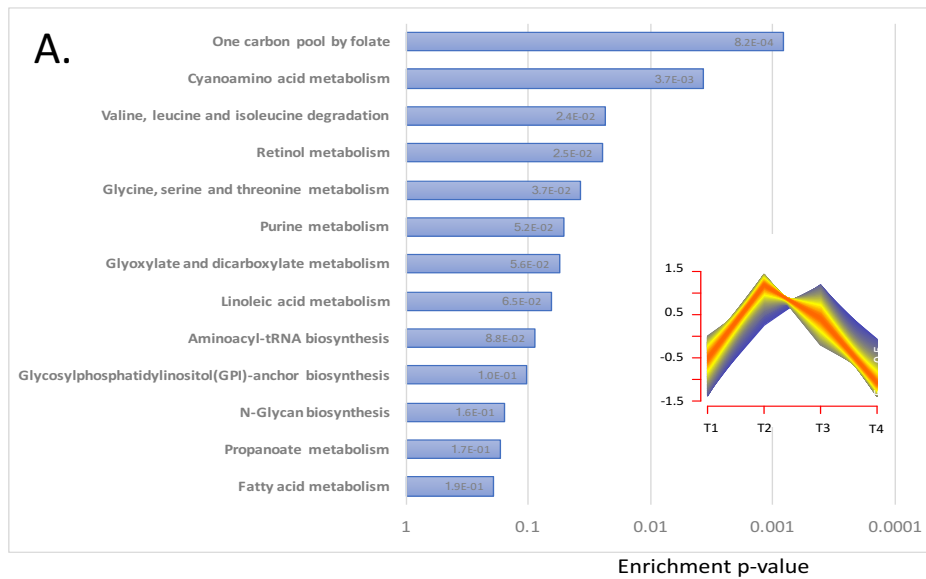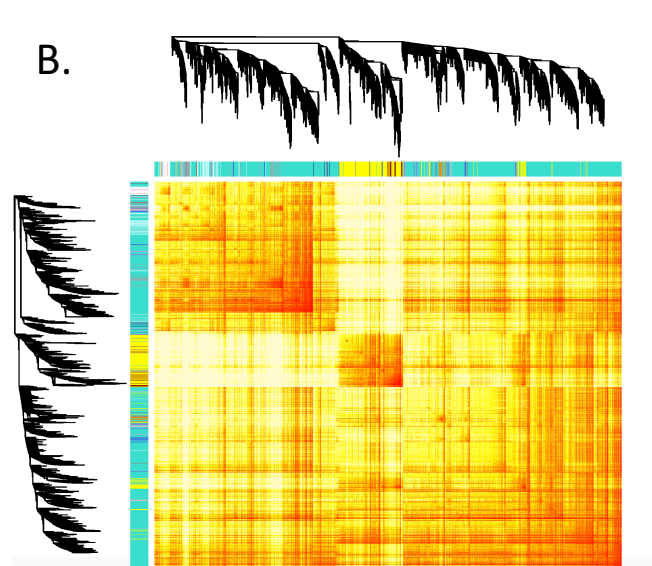

**Figure S4. Patterns observed in response to weight gain and loss. Related to Figure 4.** A) Longitudinal multi-omic pathway analysis reveals long-term changes. Pathway analysis of biomolecules comprising longitudinal Cluster 02, which fails to return to baseline following weight loss. B) Weighted gene coexpression network analysis and correlation with clinical variables. Weighted gene-coexpression network analysis (WGCNA) was applied to transcriptomic data for all participants and all timepoints, and a heatmap and dendrogram detailing the clustering results is shown (note only the top 5000 genes are plotted). The identified co-expressed gene modules were tested for biological pathway enrichment (Gene Ontology terms) as well as association with clinical variables (see Fig. 4 C and D).

A.

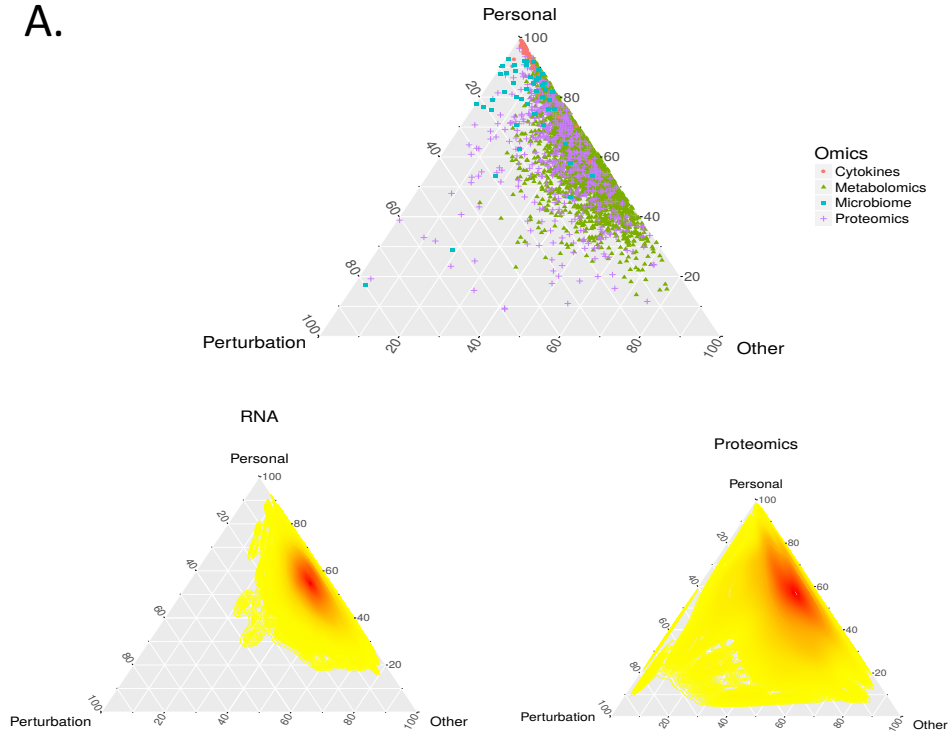

B.

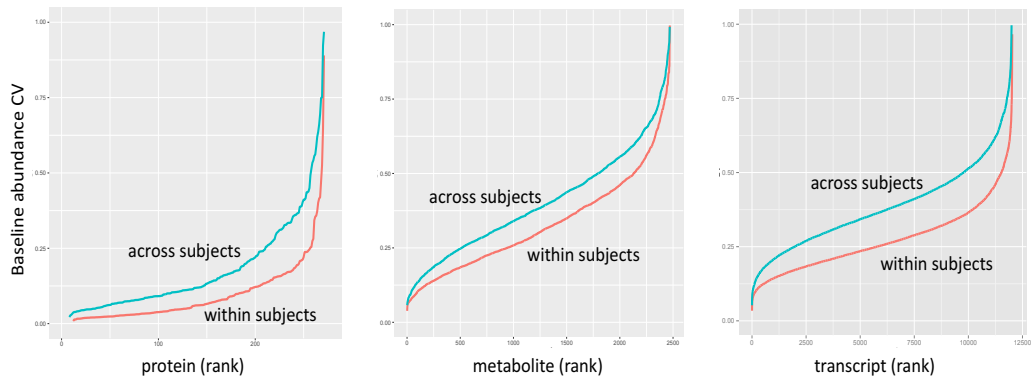

**Figure S5. Analysis of personal and other sources of omic variation. Related to Figure 6.** A) Variance decomposition analysis of selected 'omes. The variance across all timepoints was deconvolved into experiment-dependent variation (i.e. due to the perturbation), personal variation (within an individual), or other types of variation (technical or unknown sources). This is plotted as a scatterplot for all 'omes (top panel) as well as individual 'omics types (see Fig. 6A for others). B) Variation in 'omics analyte abundance within participants versus across participants. The coefficients of variation for proteins, metabolites and transcripts are plotted across steady-state timepoints (T1 and T4) within an individual (red) and across individuals (blue).

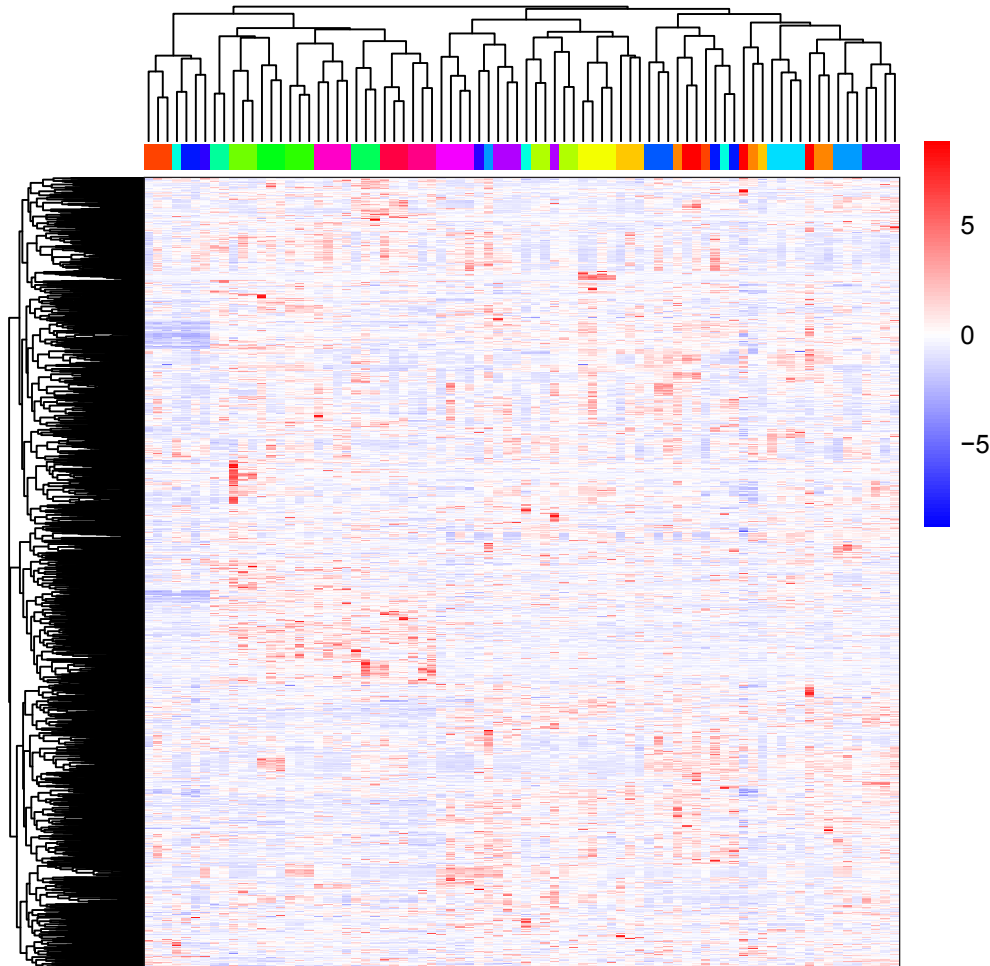

**Figure S6. Distribution of plasma metabolite concentrations across the dataset following normalization. Related to Figures 2, 3 and 4.** Heatmap showing the abundance of each metabolite in each sample of the study; each color in the top column header represents a different individual in the study (clustering distance = Pearson correlation, clustering method = Complete).



| Metric              | IR_average | IR_sd | IS_average | IS_sd | FDR      |
|---------------------|------------|-------|------------|-------|----------|
| SSPG                | 206.35     | 37.8  | 77.2       | 27.15 | 2.35E-07 |
| ETHNICITY(C/B/A)    | 8/0/5      | -     | 6/3/1      | -     | 0.1      |
| AGE                 | 58         | 5     | 56         | 6     | 0.612    |
| SEX(M/F)            | 6/7        | -     | 3/7        | -     | 0.667    |
| Waist Circumference | 104        | 8     | 97         | 7     | 0.048    |
| Systolic BP         | 123        | 7     | 121        | 14    | 0.6      |
| Diastolic BP        | 78         | 6     | 76         | 4     | 0.32     |
| BMI                 | 30.51      | 2.9   | 28.57      | 2.81  | 0.612    |
| A1C                 | 5.55       | 0.26  | 5.49       | 0.41  | 1        |
| AG                  | 8.25       | 2.43  | 9.33       | 1.97  | 0.612    |
| ALB                 | 3.9        | 0.17  | 3.92       | 0.17  | 1        |
| ALKP                | 81         | 17.82 | 105        | 26.77 | 0.612    |
| ALT                 | 35.9       | 11.75 | 38.67      | 9.48  | 0.887    |
| AST                 | 21.88      | 4.26  | 21.67      | 3.33  | 1        |
| BASO                | 0.73       | 0.56  | 0.76       | 0.4   | 1        |
| BASOAB              | 0.04       | 0.03  | 0.04       | 0.02  | 1        |
| BUN                 | 12.38      | 2.5   | 14.67      | 1.97  | 0.612    |
| CA                  | 9.08       | 0.32  | 9.02       | 0.24  | 1        |
| CHOL                | 188.56     | 30.7  | 188.6      | 27.05 | 1        |
| CHOLHDL             | 4.14       | 1.27  | 3.1        | 1.01  | 0.612    |
| CL                  | 104.63     | 2.26  | 103.17     | 2.64  | 0.736    |
| CO2                 | 27.5       | 1.85  | 28.17      | 1.17  | 0.871    |
| CR                  | 0.78       | 0.13  | 0.95       | 0.22  | 0.612    |
| EOS                 | 1.78       | 0.86  | 2.73       | 1.73  | 0.612    |
| EOSAB               | 0.11       | 0.06  | 0.15       | 0.12  | 0.887    |
| GLOB                | 3.19       | 0.16  | 3          | 0.24  | 0.612    |
| GLU                 | 91.88      | 15.59 | 89.17      | 12.56 | 1        |
| HCT                 | 40.18      | 5.3   | 41.14      | 3.81  | 1        |
| HDL                 | 47.89      | 8.01  | 67.4       | 29.04 | 0.667    |
| HGB                 | 13.51      | 2.08  | 13.83      | 1.32  | 1        |
| hsCRP               | 1.16       | 0.55  | 3          | 0.92  | 0.612    |
| IGM                 | 121.25     | 58.94 | 45.83      | 20.92 | 1        |
| K                   | 4.01       | 0.27  | 4          | 0.21  | 1        |
| LDL                 | 115.33     | 31.33 | 103        | 33.98 | 0.835    |
| LDLHDL              | 2.59       | 1.08  | 1.76       | 0.87  | 0.612    |
| LYM                 | 29.78      | 5.34  | 29.46      | 5.46  | 1        |
| LYMAB               | 1.76       | 0.35  | 1.6        | 0.66  | 0.617    |
| MCH                 | 29.74      | 3.78  | 30.64      | 1.05  | 1        |
| MCHC                | 33.51      | 1     | 33.63      | 0.43  | 1        |
| MCV                 | 88.51      | 9.71  | 91.2       | 3.81  | 1        |
| MONO                | 6.88       | 1.67  | 7.19       | 2.04  | 1        |
| MONOAB              | 0.4        | 0.08  | 0.39       | 0.16  | 1        |
| NA.                 | 140.38     | 2.39  | 140.67     | 2.66  | 1        |
| NEUT                | 60.85      | 5.37  | 59.87      | 7.67  | 1        |
| NEUTAB              | 3.64       | 0.68  | 3.26       | 1.05  | 0.824    |
| NHDL                | 141        | 36.92 | 121.2      | 29.17 | 1        |
| PLT                 | 239.13     | 90.09 | 220.57     | 59.32 | 1        |
| RBC                 | 4.54       | 0.38  | 4.52       | 0.49  | 1        |
| RDW                 | 14.1       | 1.74  | 13.74      | 0.72  | 1        |
| TBIL                | 0.69       | 0.29  | 0.53       | 0.13  | 0.612    |
| TGL                 | 129.67     | 40.64 | 90         | 59.27 | 0.612    |
| TP                  | 7.09       | 0.21  | 6.92       | 0.29  | 0.667    |
| WBC                 | 5.98       | 0.76  | 5.44       | 1.73  | 0.676    |
| Weight              | 86.95      | 12.23 | 78.89      | 10.31 | 0.612    |
| Weight Gain         | 2          | 1.1   | 3.6        | 1.7   | 0.029    |

**Table S1. An overview of clinical parameters measured in the study. Related to Figure 1.** Both participant statistics as well as clinical blood panel results are shown for IR and IS subgroups in the study.

**Table S2. Significant differences in transcripts, proteins, metabolites, microbes, clinical assays and pathways between IR and IS individuals. Related to Figure 2.** Individual analyte types are separated into unique tabs in the attached excel table. For RNA-seq, differentially expressed transcripts (Ensembl) at FDR < 0.01 are listed along with associated fold changes and p and q values for the test. For transcriptomic pathways, differential transcripts between IR and IS at FDR < 0.2 were used as input to the DAVID pathway analysis suite. Significant pathways from either KEGG or Gene Ontology biological process categories are listed. For proteomic pathways, proteomic data ranked by differential expression between IR and IS was used as input into GORILLA. Significant pathways are listed. For the microbiome, average abundance values from both 16S sequencing (in percentage) and whole genome shotgun sequencing (mWGS, in %) are listed for IR and IS individuals for bacteria that are significantly different ( $p < 0.05$ ) between the group. Taxonomic units that are detected by both methods are bolded, with their prevalence indicated by columns labeled as “nonzeros”. For targeted Proseek multiplex assays, immunoassays were performed on plasma and the groupwise differences between IR and IS across all timepoints is shown. For Luminex cytokine/chemokine/adipokine assays, immunoassays were performed on plasma and the groupwise differences between IR and IS across all timepoints is shown. For clinical parameters, clinical blood panels were performed by the Stanford core lab, and significant analytes between IR and IS across all timepoints are shown. For metabolomics, LC-MS metabolomics differences between IR and IS (across all timepoints) are shown.

**Table S3. Significant differences in transcripts, proteins, metabolites, metabolites and clinical assays across the weight gain/loss perturbation. Related to Figures 3, 4 and 5.** Individual analyte types are separated into unique tabs in the attached excel table. For RNA-seq, differentially expressed transcripts (Ensembl) at FDR < 0.01 are listed along with associated fold changes and p and q values for the test for both the differences between baseline and weight gain and weight gain vs weight loss. For the microbiome, average changes in abundance (T2 minus T1) from both 16S sequencing (in percentage) and whole genome shotgun sequencing (mWGS, in %) are listed for IR and IS individuals for bacteria that are significantly different ( $p < 0.05$ ) between the group. Taxonomic units that are detected by both methods are bolded, with their prevalence indicated by columns labeled as “nonzeros”. For metabolomics data, differences across all timepoints are shown, as well as BMI-associated changes. For Proseek multiplex protein assays, all immunoassays were performed on plasma and associations with changes in BMI in the study are shown. For Luminex cytokine/chemokine/adipokine assays, the immunoassays were performed on plasma and associations with changes in BMI in the study are shown. Clinical blood panels were performed by the Stanford core lab, and significant associations with changes in BMI in the study are shown.

| COHORT 1 METABOLITE             | FORMULA    | COHORT 1 DELTA CHANGE | COHORT 2 METABOLITE            | FORMULA    | COHORT 2 DELTA CHANGE |
|---------------------------------|------------|-----------------------|--------------------------------|------------|-----------------------|
| L-Tyrosine                      | C9H11NO3   | UP                    | tyrosine                       | C9H11NO3   | UP                    |
| Benzyl sulfate p-Cresol sulfate | C7H8O4S    | DOWN                  | p-cresol sulfate               | C7H8O4S    | DOWN                  |
| L-Carnitine                     | C7H15NO3   | DOWN                  | carnitine                      | C7H15NO3   | DOWN                  |
| Citric acid Isocitric acid      | C6H8O7     | DOWN                  | citrate                        | C6H8O7     | DOWN                  |
| N-Acetylputrescine              | C6H14N2O   | UP                    | N-acetylputrescine             | C6H14N2O   | UP                    |
| C6H12O7                         | C6H12O7    | UP                    | galactonate                    | C6H12O7    | UP                    |
| C6H12O6                         | C6H12O6    | UP                    | chiro-inositol                 | C6H12O6    | DOWN                  |
| FA(6:0, OH)                     | C6H12O3    | UP                    | alpha-hydroxyisocaproate       | C6H12O3    | DOWN                  |
| L-Glutamic Acid                 | C5H9NO4    | UP                    | glutamate                      | C5H9NO4    | UP                    |
| C5H9NO4                         | C5H9NO4    | UP                    | N-acetylserine                 | C5H9NO4    | DOWN                  |
| Ribitol                         | C5H12O5    | DOWN                  | ribitol                        | C5H12O5    | UP                    |
| C5H10O6                         | C5H10O6    | UP                    | ribonate                       | C5H10O6    | UP                    |
| C5H10O5                         | C5H10O5    | UP                    | xylose                         | C5H10O5    | DOWN                  |
| L-Glutamine                     | C5H10N2O3  | DOWN                  | glutamine                      | C5H10N2O3  | DOWN                  |
| C4H9NO2                         | C4H9NO2    | DOWN                  | 2-aminobutyrate                | C4H9NO2    | DOWN                  |
| C4H8O3                          | C4H8O3     | DOWN                  | 3-hydroxybutyrate (BHBA)       | C4H8O3     | DOWN                  |
| L-Aspartic acid                 | C4H7NO4    | UP                    | aspartate                      | C4H7NO4    | UP                    |
| C4H7NO4                         | C4H7NO4    | DOWN                  | iminodiacetate (IDA)           | C4H7NO4    | DOWN                  |
| L-Serine                        | C3H7NO3    | DOWN                  | serine                         | C3H7NO3    | DOWN                  |
| L-Lactic acid                   | C3H6O3     | UP                    | lactate                        | C3H6O3     | DOWN                  |
| FA(22:6)                        | C22H32O2   | DOWN                  | docosahexaenoate (DHA; 22:6n3) | C22H32O2   | DOWN                  |
| AC(12:0)                        | C19H37NO4  | DOWN                  | laurylcarnitine                | C19H37NO4  | DOWN                  |
| FA(18:1, 2OH)                   | C18H34O4   | UP                    | octadecanedioate               | C18H34O4   | DOWN                  |
| AC(10:0)                        | C17H33NO4  | DOWN                  | decanoylcarnitine              | C17H33NO4  | DOWN                  |
| AC(9:1)                         | C15H29NO4  | DOWN                  | octanoylcarnitine              | C15H29NO4  | DOWN                  |
| Hypaphorine                     | C14H18N2O2 | UP                    | tryptophan betaine             | C14H18N2O2 | UP                    |
| FA(12:0, OH)                    | C12H24O3   | DOWN                  | 3-hydroxylaurate               | C12H24O3   | DOWN                  |
| FA(12:1)                        | C12H22O2   | DOWN                  | 5-dodecenoate (12:1n7)         | C12H22O2   | DOWN                  |
| FA(10:0, OH)                    | C10H20O3   | DOWN                  | 3-hydroxydecanoate             | C10H20O3   | DOWN                  |
| Gamma-Glutamylglutamine         | C10H17N3O6 | DOWN                  | gamma-glutamylglutamine        | C10H17N3O6 | DOWN                  |
| C10H16N2O7                      | C10H16N2O7 | DOWN                  | gamma-glutamylglutaminate      | C10H16N2O7 | UP                    |

**Table S4. Validation of metabolomic changes in a validation cohort. Related to Figure 3.** Significant weight-responsive metabolites (Cohort 1) were compared to data from a separate weight-change cohort conducted in Sweden (Cohort 2) (see STAR Methods). The subset of metabolites that were interrogated in both studies were compared (based on elemental composition). The list of overlapping metabolites that were significant in both cohorts is listed above, and the subset that changed in the same direction in response to weight change is indicated in green.

| Participant Identifier | Timepoint | Trimmed reads | Fraction Mapped |
|------------------------|-----------|---------------|-----------------|
| ZJTAE3                 | 1         | 41217787      | 0.994           |
| ZJTAE3                 | 2         | 44563611      | 0.992           |
| ZJTAE3                 | 3         | 42854136      | 0.993           |
| ZJTAE3                 | 4         | 46698867      | 0.993           |
| ZK112BX                | 1         | 32354021      | 0.965           |
| ZK112BX                | 2         | 34366551      | 0.963           |
| ZK112BX                | 3         | 32701809      | 0.961           |
| ZK112BX                | 4         | 18401108      | 0.959           |
| ZK4CK8Y                | 1         | 13281979      | 0.977           |
| ZK4CK8Y                | 2         | 46366564      | 0.987           |
| ZK4CK8Y                | 3         | 20661317      | 0.987           |
| ZK4CK8Y                | 4         | 44485215      | 0.992           |
| ZKFV71L                | 1         | 9949488       | 0.981           |
| ZKFV71L                | 2         | 26920406      | 0.988           |
| ZKFV71L                | 3         | 22390173      | 0.980           |
| ZKFV71L                | 4         | 36961237      | 0.993           |
| ZKVR426                | 1         | 12309870      | 0.990           |
| ZKVR426                | 2         | 30574718      | 0.994           |
| ZKVR426                | 3         | 23059678      | 0.982           |
| ZKVR426                | 4         | 33232194      | 0.989           |
| ZL63I8R                | 1         | 42392503      | 0.997           |
| ZL63I8R                | 2         | 45403170      | 0.997           |
| ZL63I8R                | 3         | 39346873      | 0.990           |
| ZL63I8R                | 4         | 47343881      | 0.994           |
| ZL9BTWF                | 1         | 26132750      | 0.995           |
| ZL9BTWF                | 2         | 38092899      | 0.998           |
| ZL9BTWF                | 3         | 26412111      | 0.992           |
| ZL9BTWF                | 4         | 32837330      | 0.996           |
| ZLGD9MO                | 1         | 24180646      | 0.988           |
| ZLGD9MO                | 3         | 42798325      | 0.998           |
| ZLPRB8E                | 1         | 48759209      | 0.992           |
| ZLPRB8E                | 2         | 13486634      | 0.987           |
| ZLPRB8E                | 3         | 13703986      | 0.985           |
| ZLPRB8E                | 4         | 21426079      | 0.980           |
| ZLPZSOH                | 1         | 19885777      | 0.989           |
| ZLPZSOH                | 2         | 10500452      | 0.954           |
| ZLPZSOH                | 3         | 17565278      | 0.987           |
| ZLPZSOH                | 4         | 17847264      | 0.989           |
| ZLTUJTN                | 2         | 36530224      | 0.992           |
| ZLTUJTN                | 3         | 35747043      | 0.988           |
| ZLTUJTN                | 4         | 35394019      | 0.990           |
| ZM7JY3G                | 1         | 41579948      | 0.993           |
| ZM7JY3G                | 2         | 40127702      | 0.995           |
| ZM7JY3G                | 3         | 29403577      | 0.993           |
| ZM7JY3G                | 4         | 40165302      | 0.993           |
| ZMBH10Z                | 1         | 63476524      | 0.962           |
| ZMBH10Z                | 2         | 55115736      | 0.960           |
| ZMBH10Z                | 3         | 64730488      | 0.962           |
| ZMBVNFM                | 1         | 42051095      | 0.992           |
| ZMBVNFM                | 2         | 45300712      | 0.992           |
| ZMBVNFM                | 3         | 51478794      | 0.994           |
| ZMBVNFM                | 4         | 38594024      | 0.992           |
| ZVGW5FI                | 1         | 14977108      | 0.991           |
| ZVGW5FI                | 2         | 25467371      | 0.991           |
| ZVGW5FI                | 3         | 24558474      | 0.992           |
| ZVM4N7A                | 1         | 12883989      | 0.994           |
| ZVM4N7A                | 2         | 30106252      | 0.990           |
| ZVM4N7A                | 3         | 34049640      | 0.991           |
| ZVTCAK9                | 1         | 19295425      | 0.990           |
| ZVTCAK9                | 2         | 23708120      | 0.993           |
| ZVTCAK9                | 3         | 56448999      | 0.993           |
| ZW61YGW                | 1         | 29488957      | 0.991           |
| ZW61YGW                | 2         | 21080657      | 0.992           |
| ZW61YGW                | 3         | 27035844      | 0.992           |
| ZWCZHYY                | 1         | 19691104      | 0.991           |
| ZWCZHYY                | 2         | 24531478      | 0.992           |
| ZWCZHYY                | 3         | 23007507      | 0.990           |
| ZWFDEYO                | 1         | 28307124      | 0.993           |
| ZWFDEYO                | 2         | 18462648      | 0.992           |
| ZWFDEYO                | 3         | 36625835      | 0.992           |
| ZWHMV5E                | 1         | 34453080      | 0.992           |
| ZWHMV5E                | 2         | 38872637      | 0.992           |
| ZWHMV5E                | 3         | 29782389      | 0.992           |
| ZY1ZKIY                | 1         | 34924914      | 0.993           |
| ZY1ZKIY                | 2         | 37565095      | 0.992           |
| ZY1ZKIY                | 3         | 34723083      | 0.992           |
| ZY1ZKIY                | 4         | 36983654      | 0.991           |
| ZY7IW45                | 1         | 23125720      | 0.993           |
| ZY7IW45                | 2         | 24499140      | 0.991           |
| ZY7IW45                | 3         | 22359660      | 0.992           |

**Table S5. Read depth and mapping fraction for RNA-seq data. Related to Figures 2, 3, 4 and 6.**

| Subject ID and Timepoint | Total reads QC_raw | Total reads QC_trim | Assembled 16S Amplicons QC_combined | % Total Reads Utilized | 16S Amplicons QC_nonchimera | % Chimeric Amplicons | 16S Amplicons QC_nonhost | % Human Host Amplicons | Final % Total Reads Utilized |
|--------------------------|--------------------|---------------------|-------------------------------------|------------------------|-----------------------------|----------------------|--------------------------|------------------------|------------------------------|
| ZMBVNF-01                | 212838             | 212838              | 68062                               | 63.96%                 | 55842                       | 17.95%               | 55842                    | 0.0000%                | 52.47%                       |
| ZMBVNF-02                | 187860             | 187860              | 59641                               | 63.50%                 | 50377                       | 15.33%               | 50377                    | 0.0000%                | 53.63%                       |
| ZMBVNF-03                | 173742             | 173742              | 58023                               | 66.79%                 | 45472                       | 21.63%               | 45472                    | 0.0000%                | 52.34%                       |
| ZMBVNF-04                | 217376             | 217376              | 67521                               | 62.12%                 | 52157                       | 22.75%               | 52157                    | 0.0000%                | 47.99%                       |
| ZMBH10Z-01               | 208022             | 208022              | 55557                               | 53.41%                 | 44222                       | 20.40%               | 44222                    | 0.0000%                | 42.52%                       |
| ZMBH10Z-02               | 135330             | 135330              | 35019                               | 51.75%                 | 27953                       | 20.18%               | 27953                    | 0.0000%                | 41.31%                       |
| ZMBH10Z-03               | 183918             | 183918              | 52781                               | 57.40%                 | 42990                       | 18.55%               | 42990                    | 0.0000%                | 46.75%                       |
| ZMBH10Z-04               | 385794             | 385566              | 82727                               | 42.91%                 | 68807                       | 16.83%               | 68806                    | 0.0015%                | 35.67%                       |
| ZM7Y3G-01                | 188920             | 188920              | 59789                               | 63.30%                 | 46114                       | 22.87%               | 46114                    | 0.0000%                | 48.82%                       |
| ZM7Y3G-02                | 213760             | 213760              | 65047                               | 60.86%                 | 51521                       | 20.79%               | 51521                    | 0.0000%                | 48.20%                       |
| ZM7Y3G-04                | 104192             | 104192              | 33957                               | 65.14%                 | 26887                       | 21.01%               | 26887                    | 0.0000%                | 51.46%                       |
| ZY7W45-01                | 202522             | 202522              | 37598                               | 26.62%                 | 29379                       | 21.86%               | 29379                    | 0.0000%                | 20.80%                       |
| ZY7W45-02                | 284600             | 284600              | 33526                               | 23.56%                 | 25253                       | 24.68%               | 25253                    | 0.0000%                | 17.75%                       |
| ZY7W45-03                | 255716             | 255716              | 34555                               | 27.03%                 | 26155                       | 24.31%               | 26155                    | 0.0000%                | 20.46%                       |
| ZY7W45-04                | 286612             | 286612              | 45051                               | 31.44%                 | 36161                       | 19.73%               | 36161                    | 0.0000%                | 25.23%                       |
| ZY12KY-02                | 126058             | 126058              | 23412                               | 37.14%                 | 17575                       | 24.93%               | 17575                    | 0.0000%                | 27.88%                       |
| ZY12KY-03                | 153340             | 153340              | 32928                               | 42.95%                 | 25492                       | 22.58%               | 25492                    | 0.0000%                | 33.25%                       |
| ZY12KY-04                | 159038             | 159038              | 32138                               | 40.42%                 | 25476                       | 20.73%               | 25476                    | 0.0000%                | 32.04%                       |
| ZWFDEY-01                | 288392             | 288392              | 53102                               | 36.83%                 | 42010                       | 20.89%               | 42010                    | 0.0000%                | 29.13%                       |
| ZWFDEY-02                | 278026             | 278026              | 50320                               | 36.20%                 | 38813                       | 22.87%               | 38813                    | 0.0000%                | 27.92%                       |
| ZWCZHY-01                | 315574             | 315574              | 45969                               | 29.13%                 | 34864                       | 24.16%               | 34864                    | 0.0000%                | 22.10%                       |
| ZWCZHY-02                | 297806             | 297806              | 42404                               | 28.48%                 | 34224                       | 19.29%               | 34224                    | 0.0000%                | 22.98%                       |
| ZWCZHY-03                | 303286             | 303286              | 37432                               | 24.68%                 | 26008                       | 30.52%               | 26008                    | 0.0000%                | 17.15%                       |
| ZWCZHY-04                | 403014             | 403014              | 56908                               | 28.24%                 | 34202                       | 39.90%               | 34201                    | 0.0029%                | 16.97%                       |
| ZW61YGW-01               | 249072             | 249072              | 34173                               | 27.44%                 | 24138                       | 29.37%               | 24138                    | 0.0000%                | 19.38%                       |
| ZW61YGW-02               | 260356             | 260356              | 35549                               | 27.31%                 | 23929                       | 32.69%               | 23929                    | 0.0000%                | 18.38%                       |
| ZW61YGW-03               | 245966             | 245966              | 36651                               | 29.80%                 | 24213                       | 33.94%               | 24213                    | 0.0000%                | 19.69%                       |
| ZVM4N7A-01               | 294366             | 294366              | 50306                               | 34.18%                 | 36150                       | 28.14%               | 36150                    | 0.0000%                | 24.56%                       |
| ZVM4N7A-02               | 340620             | 340620              | 54607                               | 32.06%                 | 41586                       | 23.84%               | 41586                    | 0.0000%                | 24.42%                       |
| ZVGWSF-01                | 265576             | 265576              | 54886                               | 41.13%                 | 46680                       | 14.95%               | 46680                    | 0.0000%                | 35.15%                       |
| ZVGWSF-02                | 219608             | 219608              | 17367                               | 15.82%                 | 13565                       | 21.89%               | 13565                    | 0.0000%                | 12.35%                       |
| ZVGWSF-03                | 477886             | 477886              | 40152                               | 16.80%                 | 29671                       | 26.10%               | 29671                    | 0.0000%                | 14.42%                       |
| ZKVR26-01                | 161084             | 161084              | 52407                               | 65.07%                 | 40687                       | 22.36%               | 40687                    | 0.0000%                | 50.52%                       |
| ZKVR26-02                | 215364             | 215364              | 68380                               | 63.50%                 | 55217                       | 19.25%               | 55217                    | 0.0000%                | 51.28%                       |
| ZKVR26-03                | 210612             | 210612              | 64734                               | 61.47%                 | 53638                       | 17.14%               | 53638                    | 0.0000%                | 50.94%                       |
| ZKVR26-04                | 142794             | 142794              | 47505                               | 66.54%                 | 38246                       | 19.49%               | 38246                    | 0.0000%                | 53.57%                       |
| ZKFV71L-01               | 145478             | 145478              | 46775                               | 64.31%                 | 39793                       | 14.93%               | 39793                    | 0.0000%                | 54.71%                       |
| ZKFV71L-02               | 450904             | 450822              | 85366                               | 37.87%                 | 71860                       | 15.82%               | 71860                    | 0.0000%                | 31.87%                       |
| ZKFV71L-04               | 168898             | 168898              | 53904                               | 63.83%                 | 43174                       | 19.91%               | 43174                    | 0.0000%                | 51.12%                       |
| ZKACK8Y-01               | 394636             | 394578              | 76636                               | 38.84%                 | 64809                       | 15.43%               | 64807                    | 0.0031%                | 32.84%                       |
| ZKACK8Y-02               | 188732             | 188732              | 57539                               | 60.97%                 | 48467                       | 15.77%               | 48467                    | 0.0000%                | 51.36%                       |
| ZKACK8Y-03               | 250860             | 250860              | 73642                               | 58.71%                 | 63292                       | 14.05%               | 63292                    | 0.0000%                | 50.46%                       |
| ZKACK8Y-04               | 205860             | 205860              | 63108                               | 61.31%                 | 55843                       | 11.51%               | 55843                    | 0.0000%                | 54.25%                       |
| ZK1128X-01               | 202666             | 202666              | 60336                               | 59.54%                 | 48051                       | 20.36%               | 48051                    | 0.0000%                | 47.42%                       |
| ZK1128X-02               | 178968             | 178968              | 53497                               | 59.78%                 | 47936                       | 10.39%               | 47936                    | 0.0000%                | 53.75%                       |
| ZK1128X-03               | 212606             | 212606              | 66887                               | 62.92%                 | 51399                       | 23.16%               | 51399                    | 0.0000%                | 48.35%                       |
| ZITKAE3-01               | 193464             | 193464              | 54088                               | 55.92%                 | 41351                       | 23.55%               | 41351                    | 0.0000%                | 42.75%                       |
| ZITKAE3-02               | 164388             | 164388              | 43381                               | 52.78%                 | 33910                       | 21.83%               | 33910                    | 0.0000%                | 41.26%                       |
| ZITKAE3-04               | 110246             | 110246              | 30474                               | 55.28%                 | 23393                       | 23.24%               | 23393                    | 0.0000%                | 42.44%                       |

**Table S6. Read and assembly stats for microbiome samples. Related to Figures 2, 3, 4, 5 and 6.**
